# Supplementary material
Source: MDPI journal article supplement (https://www.mdpi.com/2410-3888/7/1/43)
Supplement: s1 [file s1]

**Table S2.** Sequencing data and selected reference genome sequence alignment results.

| Samples            | Total Reads | Mapped Reads | Uniq Mapped Reads | Multiple Map Reads | Reads Map to '+' | Reads Map to '-' |
|--------------------|-------------|--------------|-------------------|--------------------|------------------|------------------|
| hybrid             | 41 702      | 28 144 612   | 27 150 517        | 994 095            | 13 990 952       | 14 051 936       |
| tilapia (NA)       | 610         | (67.49%)     | (65.11%)          | (2.38%)            | (33.55%)         | (33.70%)         |
| <i>O.niloticus</i> | 42 152      | 31 130 747   | 30 155 953        | 974 794            | 15 495 455       | 15 542 463       |
| (N)                | 458         | (73.85%)     | (754%)            | (2.31%)            | (36.76%)         | (36.87%)         |
| <i>O.aureus</i>    | 47 006      | 30 915 223   | 29 873 658        | 1 041 565          | 15 329 543       | 15 483 390       |
| (A)                | 714         | (65.77%)     | (63.55%)          | (2.22%)            | (32.61%)         | (32.94%)         |
