# Supplementary material
Source: MDPI journal article supplement (https://www.mdpi.com/2410-3888/7/1/43)
Supplement: s1 [file s1]

**Table S1.** Summary statistics of clean transcriptome sequencing data

| Samples                | Clean reads | Clean bases   | GC Content | %≥Q30  |
|------------------------|-------------|---------------|------------|--------|
| hybrid tilapia (NA)    | 20 851 305  | 6 218 510 436 | 49.15%     | 90.20% |
| <i>O.niloticus</i> (N) | 21 076 229  | 6 302 527 684 | 50.02%     | 90.29% |
| <i>O.aureus</i> (A)    | 23 503 357  | 7 020 101 902 | 49.83%     | 90.42% |
